# Supplementary material for: Genetic Diversity of Brucella melitensis in Kazakhstan in Relation to World-Wide Diversity
Source: Front Microbiol. 2019 Aug 13;10:1897. doi: 10.3389/fmicb.2019.01897 (PMC6700508; doi:10.3389/fmicb.2019.01897)
Supplement: Supplementary file 2 [file Table_2.xlsx]

## Sheet: S2 table
Supplementary Table S2
Geographic origins for Brucella genotypes
district	lon	lat	116	111	180	297	114	291	386	387	388	390	389	391	392	342	394	393	total
Kazakhstan:Akmola,City of Astana	71.4704	51.1605	12	0	0	0	0	0	0	0	0	0	0	0	0	0	0	0	12
Kazakhstan:Akmola,Sandyktauskiy	68.8025	52.3363	2	0	0	0	0	0	0	0	0	0	0	0	0	0	0	0	2
Kazakhstan:Akmola,Shortandinskiy	71.4671	51.6751	1	0	0	0	0	0	0	0	0	0	0	0	0	0	0	0	1
Kazakhstan:Akmola,Town of Kokshetau	69.4048	53.2948	3	0	0	0	0	0	0	0	0	0	0	0	0	0	0	0	3
Kazakhstan:Akmola,Tselinogradskiy	69.411	51.9165	10	0	0	0	0	0	0	0	0	0	0	0	0	0	0	0	10
Kazakhstan:Akmola,Yereymentauskiy	73.326	52.0308	3	0	0	0	0	0	0	0	0	0	0	0	0	0	0	0	3
Kazakhstan:Akmola,Zhaksynskiy	67.3833	51.8333	2	0	0	0	0	0	0	0	0	0	0	0	0	0	0	0	2
Kazakhstan:Almaty,Balkhashskiy	75.3607	45.5715	3	1	0	0	0	0	0	0	0	0	0	0	0	0	0	0	4
Kazakhstan:Almaty,City of Almaty	76.8512	43.222	117	10	3	3	5	3	0	2	1	0	0	2	1	0	0	0	147
Kazakhstan:Almaty,Iliyskiy	76.6413	44.0649	1	0	0	0	0	0	0	0	0	0	0	0	0	0	0	0	1
Kazakhstan:Almaty,Karasayskiy	76.7337	43.0935	3	0	1	0	0	0	0	0	0	0	0	0	0	0	0	0	4
Kazakhstan:Almaty,Karatalskiy	76.9083	45.7624	9	0	0	0	1	0	0	0	0	0	0	0	0	0	0	0	10
Kazakhstan:Almaty,Kerbulakskiy	78.4752	44.2671	5	1	0	0	0	0	0	0	0	0	0	0	0	0	0	0	6
Kazakhstan:Almaty,Koksuskiy	77.5573	44.7689	2	0	0	0	0	0	0	0	0	0	0	0	0	0	0	0	2
Kazakhstan:Almaty,Rayymbekskiy	79.5603	42.8523	16	0	0	0	0	0	0	0	0	0	0	0	0	0	0	0	16
Kazakhstan:Almaty,Talgarskiy	77.1117	43.115	4	0	0	0	0	0	0	1	0	0	0	0	0	0	0	0	5
Kazakhstan:Almaty,Town of Kapshagay	77.0514	43.8667	1	0	0	0	0	0	0	0	0	0	0	0	0	0	0	0	1
Kazakhstan:Almaty,Town of Taldykorgan	78.3804	45.0177	17	1	0	0	1	0	0	0	0	0	0	0	0	0	0	0	19
Kazakhstan:Almaty,Yenbekshikazakhskiy	78.202	43.5608	51	6	0	2	3	0	0	0	0	0	0	0	0	0	0	0	62
Kazakhstan:Almaty,Yeskeldinskiy	78.7292	44.9673	27	0	0	0	1	0	0	0	0	0	0	0	0	0	0	0	28
Kazakhstan:Almaty,Zhambylskiy	75.5277	43.927	11	0	0	0	0	0	0	0	0	0	0	0	0	0	0	1	12
Kazakhstan:Aqtobe,Alginskiy	57.3258	49.8997	0	0	0	0	0	2	0	0	0	0	0	0	0	0	0	0	2
Kazakhstan:Aqtobe,City of Aqtobe	57.167	50.2839	22	0	11	0	0	2	0	0	0	0	0	0	0	0	0	0	35
Kazakhstan:Aqtobe,Kargalinskiy	58.2398	50.8564	1	0	2	0	0	0	0	0	0	0	0	0	0	0	0	0	3
Kazakhstan:Aqtobe,Khobdinskiy	55.1015	50.2161	1	0	0	0	0	0	0	0	0	0	0	0	0	0	0	0	1
Kazakhstan:Aqtobe,Mugalzharskiy	58.1212	49.1768	0	0	2	0	0	0	0	0	0	0	0	0	0	0	0	0	2
Kazakhstan:Aqtobe,Temirskiy	56.8326	48.9506	9	0	2	0	0	0	0	0	0	0	0	0	0	0	0	0	11
Kazakhstan:Atyrau,City of Atyrau	51.9238	47.0945	7	0	0	0	0	0	0	0	0	0	0	0	0	0	0	0	7
Kazakhstan:Atyrau,Kyzylkoginskiy	53.8447	48.2895	2	0	0	0	0	0	0	0	0	0	0	0	0	0	0	0	2
Kazakhstan:East-Kazakhstan,Ayagozskiy	79.276	47.8971	3	0	0	0	0	0	0	0	0	0	0	0	0	0	0	0	3
Kazakhstan:East-Kazakhstan,City of Semey	80.2508	50.4233	8	0	0	0	0	0	1	0	0	0	0	0	0	0	0	0	9
Kazakhstan:East-Kazakhstan,City of Ust-Kamenogorsk	82.6017	49.9749	26	2	0	0	0	0	0	0	0	0	0	0	0	0	0	0	28
Kazakhstan:East-Kazakhstan,Glubokovskiy	82.8927	50.5458	1	0	0	0	0	0	0	0	0	0	0	0	0	0	0	0	1
Kazakhstan:East-Kazakhstan,Kokpektinskiy	82.8635	48.6591	14	3	0	0	0	0	0	0	0	0	0	0	0	0	0	0	17
Kazakhstan:East-Kazakhstan,Tarbagatayskiy	82.5732	47.5234	19	0	0	0	0	0	1	0	0	0	0	0	0	0	0	0	20
Kazakhstan:East-Kazakhstan,Town of Zaysan	84.8753	47.4701	6	1	0	0	0	0	0	0	0	0	0	0	0	0	0	0	7
Kazakhstan:East-Kazakhstan,Ulanskiy	82.6163	49.6194	1	0	0	0	0	0	0	0	0	0	0	0	0	0	0	0	1
Kazakhstan:East-Kazakhstan,Urdzharskiy	81.3865	46.9683	49	0	0	2	0	0	3	0	0	0	0	0	0	0	0	0	54
Kazakhstan:East-Kazakhstan,Zaysanskiy	85.0045	47.4976	4	0	0	0	0	0	0	0	0	0	0	0	0	0	0	0	4
Kazakhstan:East-Kazakhstan,Zharminskiy	81.251	49.36	1	0	0	0	0	0	0	0	0	0	0	0	0	0	0	0	1
Kazakhstan:Karaganda,Bukhar-Zhyrauskiy	73.6035	49.9561	1	0	0	0	0	0	0	0	0	0	0	0	0	0	0	0	1
Kazakhstan:Karaganda,City of Karaganda	73.1094	49.8047	15	0	0	0	0	0	0	0	0	0	0	0	0	0	0	0	15
Kazakhstan:Kostanay,Altynsarinskiy	64.5445	52.9888	1	0	0	0	0	0	0	0	0	0	0	0	0	0	0	0	1
Kazakhstan:Kostanay,City of Kostanay	63.6354	53.2198	1	0	0	1	0	0	0	0	0	0	0	0	0	0	0	0	2
Kazakhstan:North-Kazakhstan,Ualikhanovskiy	72.5051	53.3187	2	0	0	1	0	0	0	0	0	0	0	0	0	0	0	0	3
Kazakhstan:Pavlodar,City of Pavlodar	76.9674	52.2873	14	0	0	0	0	0	1	0	0	0	0	0	0	0	0	0	15
Kazakhstan:Pavlodar,Kachirskiy	76.3713	53.2161	2	0	0	0	0	0	0	0	0	0	0	0	0	0	0	0	2
Kazakhstan:Pavlodar,Scherbaktinskiy	78.166	52.2801	1	0	0	0	0	0	0	0	0	0	0	0	0	0	0	0	1
Kazakhstan:Pavlodar,Town of Ekibastuz	75.3151	51.7252	2	0	0	0	0	0	0	0	0	0	0	0	0	0	0	0	2
Kazakhstan:Qyzylorda,Aralskiy	59.6134	45.3963	1	0	0	0	0	0	0	0	0	0	0	0	0	0	0	0	1
Kazakhstan:Qyzylorda,City of Qyzylorda	65.4823	44.8488	36	0	0	0	0	0	0	0	0	0	1	0	0	0	0	0	37
Kazakhstan:Qyzylorda,Syrdaryinskiy	65.6016	45.5663	1	1	0	0	0	0	0	0	0	0	0	0	0	0	0	0	2
Kazakhstan:Qyzylorda,Zhalagashskiy	64.051	44.5654	6	0	0	0	0	0	0	0	0	0	0	0	0	0	0	0	6
Kazakhstan:Qyzylorda,Zhanakorganskiy	67.2074	43.7278	15	0	0	0	0	0	0	0	0	0	1	0	0	0	0	0	16
Kazakhstan:South-Kazakhstan,Abayskiy	69.5142	42.3705	1	0	0	0	0	0	0	0	0	0	0	0	0	0	0	0	1
Kazakhstan:South-Kazakhstan,Akdalinskiy	68.8839	42.4409	2	0	0	0	0	0	0	0	0	0	0	0	0	0	0	0	2
Kazakhstan:South-Kazakhstan,Arysskiy	68.1431	42.2663	70	8	0	0	0	0	0	0	0	0	0	0	0	0	0	0	78
Kazakhstan:South-Kazakhstan,Baydibekskiy	69.4785	42.974	26	1	0	0	0	0	0	0	0	0	0	0	0	0	0	0	27
Kazakhstan:South-Kazakhstan,City of Shymkent	69.5901	42.3417	90	13	1	0	0	0	0	0	3	1	0	0	0	0	0	0	108
Kazakhstan:South-Kazakhstan,Kazygurtskiy	69.5738	41.8597	19	3	0	0	0	0	0	0	0	0	0	0	0	0	0	0	22
Kazakhstan:South-Kazakhstan,Maktaaralskiy	68.2385	40.8367	4	0	0	0	0	0	0	0	0	0	0	0	0	0	0	0	4
Kazakhstan:South-Kazakhstan,Otyrarskiy	67.1894	42.5207	3	0	0	0	0	0	0	0	0	0	0	0	0	0	0	0	3
Kazakhstan:South-Kazakhstan,Saryagashskiy	68.7155	41.621	8	2	0	1	0	0	0	0	0	0	0	0	1	0	0	0	12
Kazakhstan:South-Kazakhstan,Shardarinskiy	67.1894	41.6184	24	4	0	1	0	0	0	0	0	0	0	0	0	0	0	0	29
Kazakhstan:South-Kazakhstan,Suzakskiy	68.6393	45.0994	3	0	0	0	0	0	0	0	0	1	0	0	0	0	0	0	4
Kazakhstan:South-Kazakhstan,Town of Arys	68.8129	42.4339	9	0	0	0	0	0	0	0	0	0	0	0	0	0	0	0	9
Kazakhstan:South-Kazakhstan,Town of Kentau	68.509	43.5162	7	0	0	0	0	0	0	0	0	0	0	0	0	0	0	0	7
Kazakhstan:South-Kazakhstan,Town of Otyrar	68.3472	42.9079	0	1	0	0	0	0	0	0	0	0	0	0	0	0	0	0	1
Kazakhstan:South-Kazakhstan,Town of Turkestan	68.2347	43.3051	9	1	0	0	0	0	0	0	0	0	0	0	0	0	0	0	10
Kazakhstan:South-Kazakhstan,Tulkibasskiy	70.3361	42.4539	12	2	0	0	0	0	0	0	0	0	0	0	0	0	0	0	14
Kazakhstan:West-Kazakhstan,Akzhaikskiy	51.6584	49.7135	62	0	0	0	0	0	0	0	0	0	0	0	0	0	0	0	62
Kazakhstan:West-Kazakhstan,Chingirlauskiy	54.0841	51.0981	1	0	0	0	0	0	0	0	0	0	0	0	0	0	0	0	1
Kazakhstan:West-Kazakhstan,City of Uralsk	51.3865	51.2278	38	0	3	0	0	0	0	0	0	0	0	0	0	0	0	0	41
Kazakhstan:West-Kazakhstan,Kaztalovskiy	48.744	49.6806	6	0	0	0	0	0	0	0	0	0	0	0	0	0	0	0	6
Kazakhstan:West-Kazakhstan,Syrymskiy	52.5515	50.056	10	0	0	0	0	0	0	0	0	0	0	0	0	0	0	0	10
Kazakhstan:West-Kazakhstan,Terektinskiy	49	48.5667	1	0	0	0	0	0	0	0	0	0	0	0	0	0	0	0	1
Kazakhstan:West-Kazakhstan,Zhangalinskiy	50.8067	49.568	1	0	0	0	0	0	0	0	0	0	0	0	0	0	0	0	1
Kazakhstan:Zhambyl,Bayzakskiy	71.6673	43.4339	16	1	0	0	0	0	0	0	0	0	0	0	0	0	0	0	17
Kazakhstan:Zhambyl,City of Taraz	71.398	42.8984	124	14	4	6	0	0	0	1	0	0	0	0	0	0	1	0	150
Kazakhstan:Zhambyl,Kordayskiy	75.0611	43.3395	8	1	0	0	0	0	0	0	0	0	1	0	0	0	0	0	10
Kazakhstan:Zhambyl,Moyynkumskiy	72.2246	45.1156	4	0	0	1	0	0	0	0	0	0	0	0	0	0	0	0	5
Kazakhstan:Zhambyl,Ryskulovskiy	72.5205	43.197	12	3	0	2	0	0	0	0	0	0	0	0	0	2	0	0	19
Kazakhstan:Zhambyl,Talasskiy	70.7236	43.7973	9	0	0	0	0	0	0	0	0	1	0	0	0	0	0	0	10
Kazakhstan:Zhambyl,Town of Shu	73.7631	43.6051	1	0	0	0	0	0	0	0	0	0	0	0	0	0	0	0	1
